# Supplementary material
Source: publisher figshare collection journal article supplement (https://gsajournals.figshare.com/articles/dataset/_/6976106)
Supplement: Supplementary file 1 [file 1]

Supplementary figures and figure legends

A

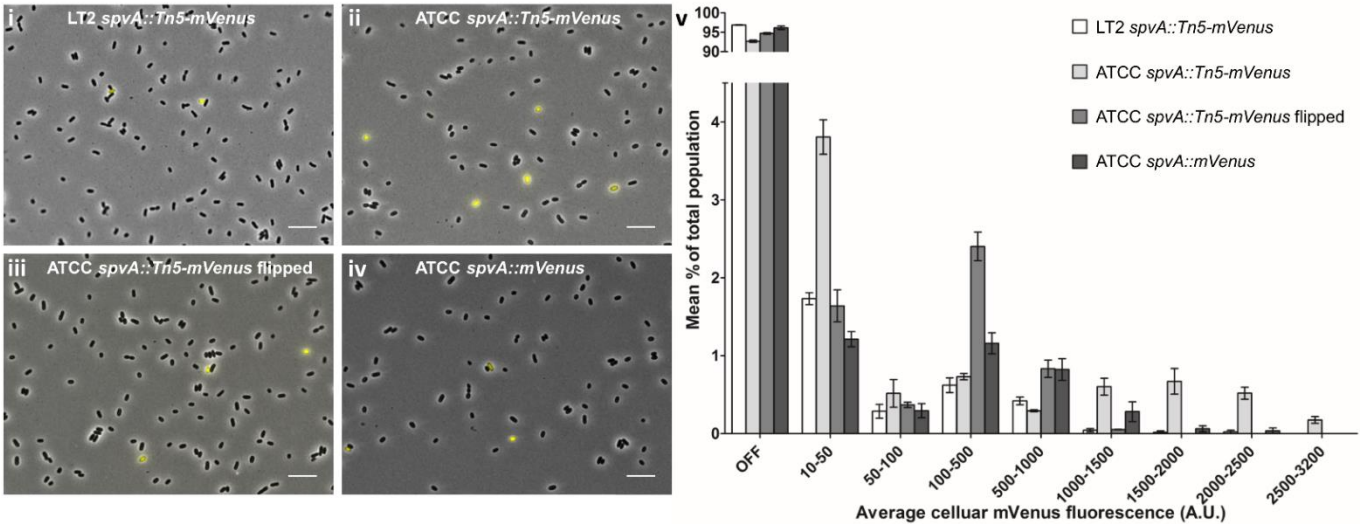

B

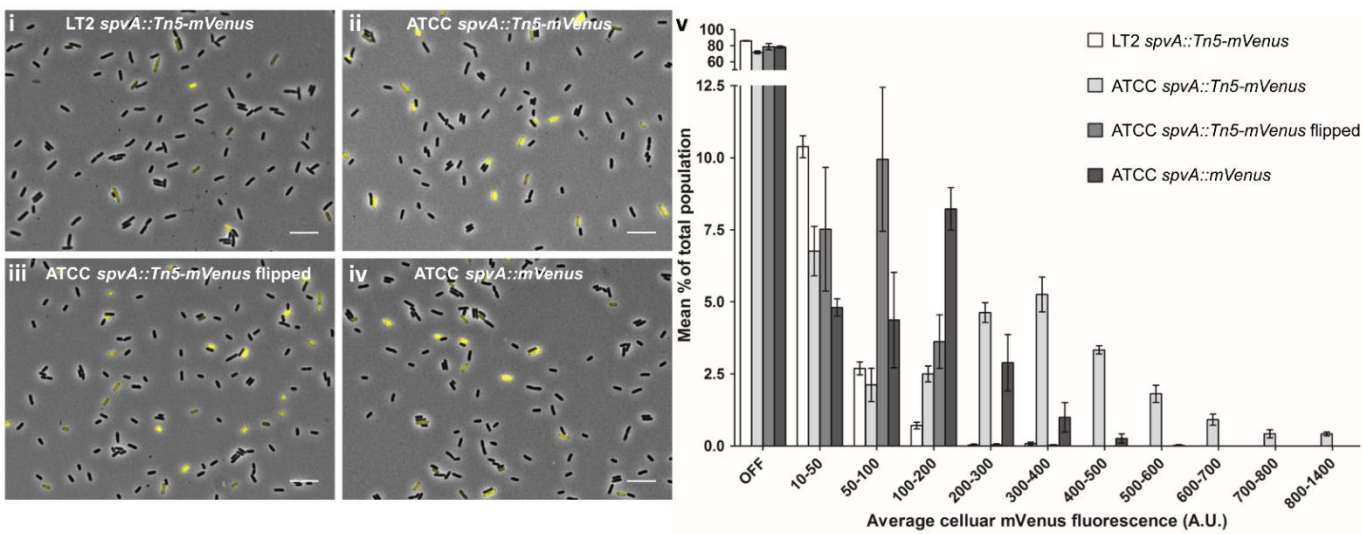

Figure S1. Bimodal expression of *spvA* and fluorescence intensity distribution of the *spvA* ON population in *S. Typhimurium* grown to stationary phase in LB medium (A) and ISM (B). (i) Representative image of the *S. Typhimurium* LT2 *spvA::Tn5-mVenus* mutant, yielding the SpvA\_59::mVenus C-terminal protein. (ii) Representative image of the *S. Typhimurium* ATCC14028s *spvA::Tn5-mVenus* mutant, yielding the SpvA\_59::mVenus C-terminal protein. (iii) Representative image of the *S. Typhimurium* ATCC14028s *spvA::Tn5-mVenus* flipped strain, yielding the SpvA\_59::mVenus::SpvA\_197 “sandwich” fusion protein. (iv) Representative image of the *S. Typhimurium* ATCC14028s *spvA::mVenus* strain, yielding the SpvA::mVenus C-terminal protein. (v) Histogram showing the distribution of the average cellular mVenus fluorescence for the four strains mentioned in panels *i-iv*. The OFF bin in this experiment was set between 0-10 A.U. and was based on visual inspection of the raw microscopy images. Averages and SEM from three biological replicates are shown. The number of cells quantified for every biological replicate of every strain was in the range of 1500 to 2200 cells for LB and of 800 to 2000 cells for ISM. The image panels in *i*, *ii*, *iii*, and *iv* represent the phase contrast channel merged with the mVenus fluorescent channel and are merely a qualitative illustration of the bimodal expression of *spvA*. Scale bars correspond to 5  $\mu\text{m}$ .

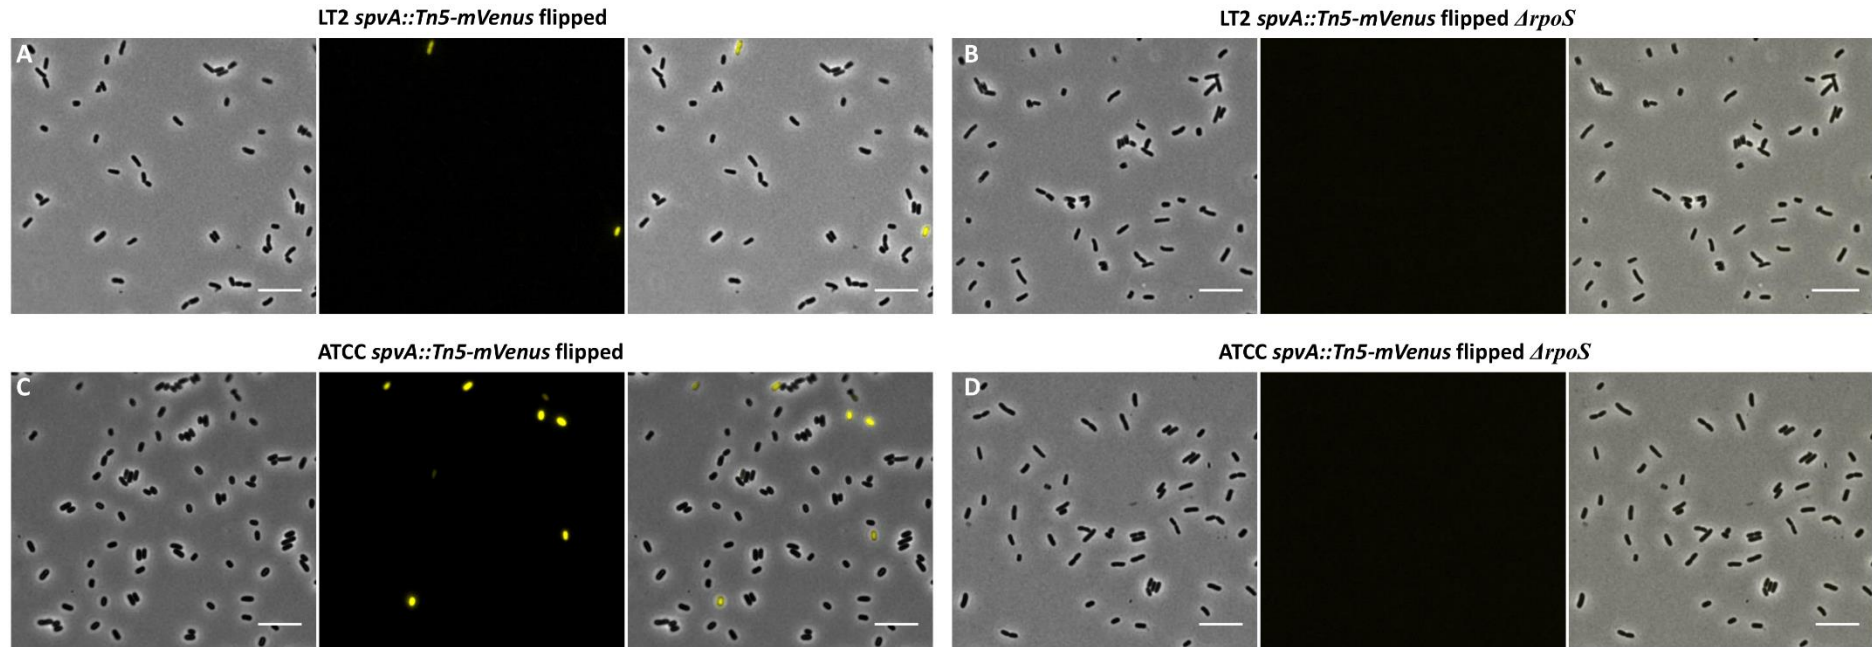

Figure S2. Knock-out of *rpoS* completely abrogates *spvA* expression in *S. Typhimurium* grown to stationary phase in LB medium. (A) Representative image of the *S. Typhimurium* LT2 *spvA::Tn5-mVenus* flipped strain. (B) Representative image of the *S. Typhimurium* LT2 *spvA::Tn5-mVenus* flipped  $\Delta rpoS$  strain. (C) Representative image of the *S. Typhimurium* ATCC14028s *spvA::Tn5-mVenus* flipped strain. (D) Representative image of the *S. Typhimurium* ATCC14028s *spvA::Tn5-mVenus* flipped  $\Delta rpoS$  strain. The image panels in A, B, C, and D represent the phase contrast channel, the mVenus fluorescent channel and the two channels merged, and are merely a qualitative illustration of the bimodal expression of *spvA*. Scale bars correspond to 5  $\mu\text{m}$ .

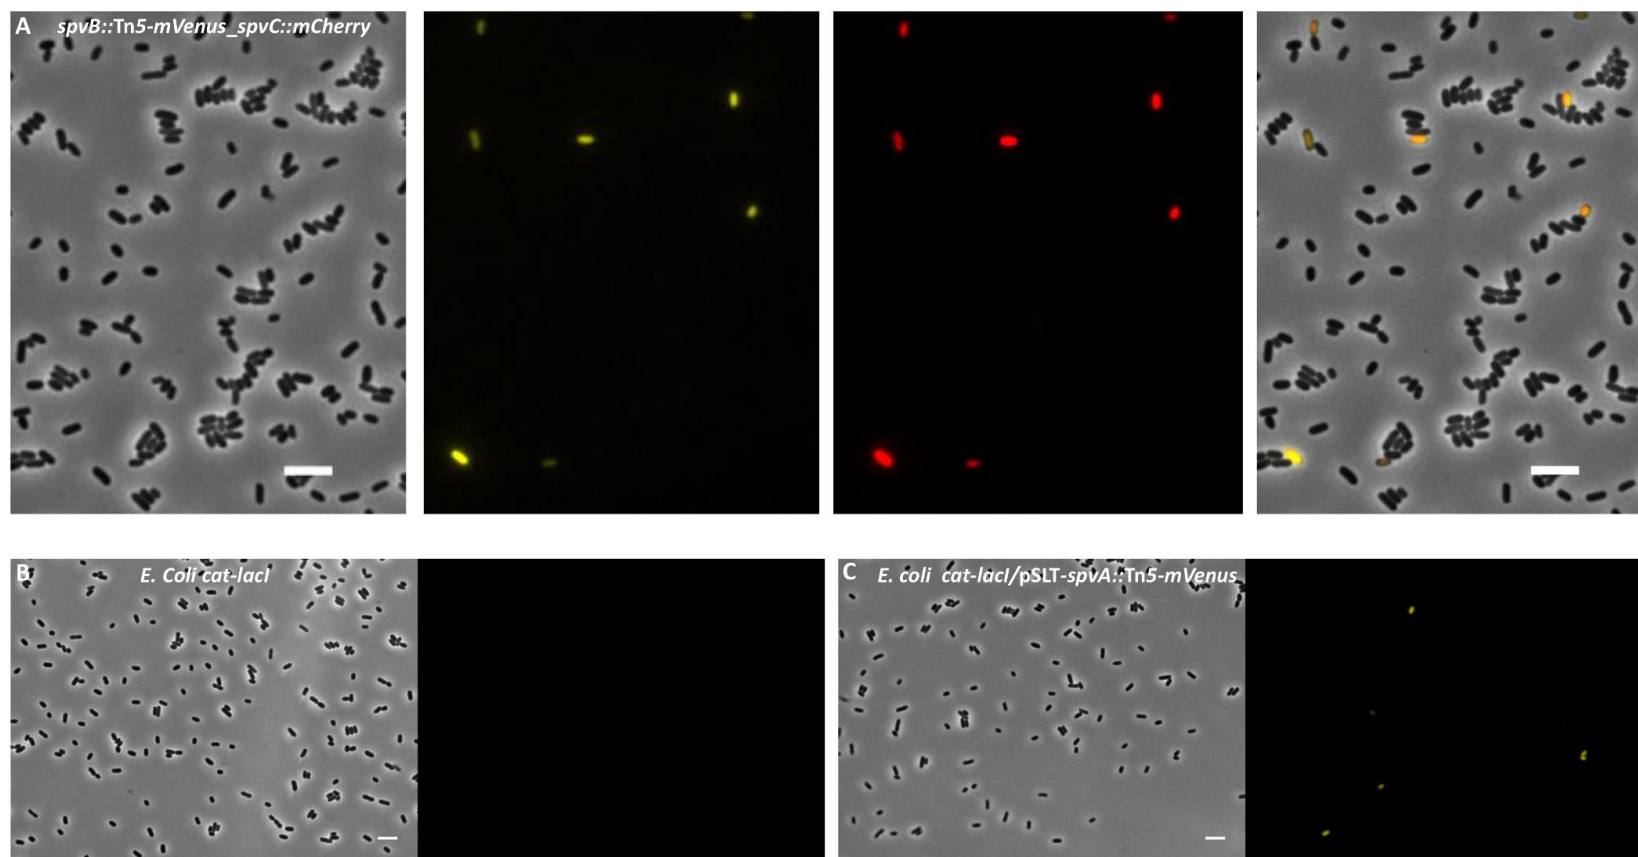

Figure S3. Cellular *spvB* and *spvC* expression patterns overlap with each other in *S. Typhimurium* ATCC14028s and bimodal expression is maintained in *E. coli* MG1655. (A) Representative image of *S. Typhimurium* ATCC14028s *spvB::Tn5-mVenus\_spvC::mCherry* grown to stationary phase in LB medium. (B) Representative image of the *E. coli* MG1655 *cat-lacI* strain grown to stationary phase in LB medium. (C) Representative image of the *E. coli* MG1655 *cat-lacI* strain harboring *pSLT-spvA::Tn5-mVenus* grown to stationary phase in LB medium. The pixel intensities in panels B and C have been adjusted similarly in order to make them visually comparable. The image panels in A represent the phase contrast channel, the YFP fluorescent channel, the mCherry fluorescent channel and the three channels merged, while the image panels in B represent the phase contrast channel and the YFP fluorescent channel. Scale bar corresponds to 5 μm.



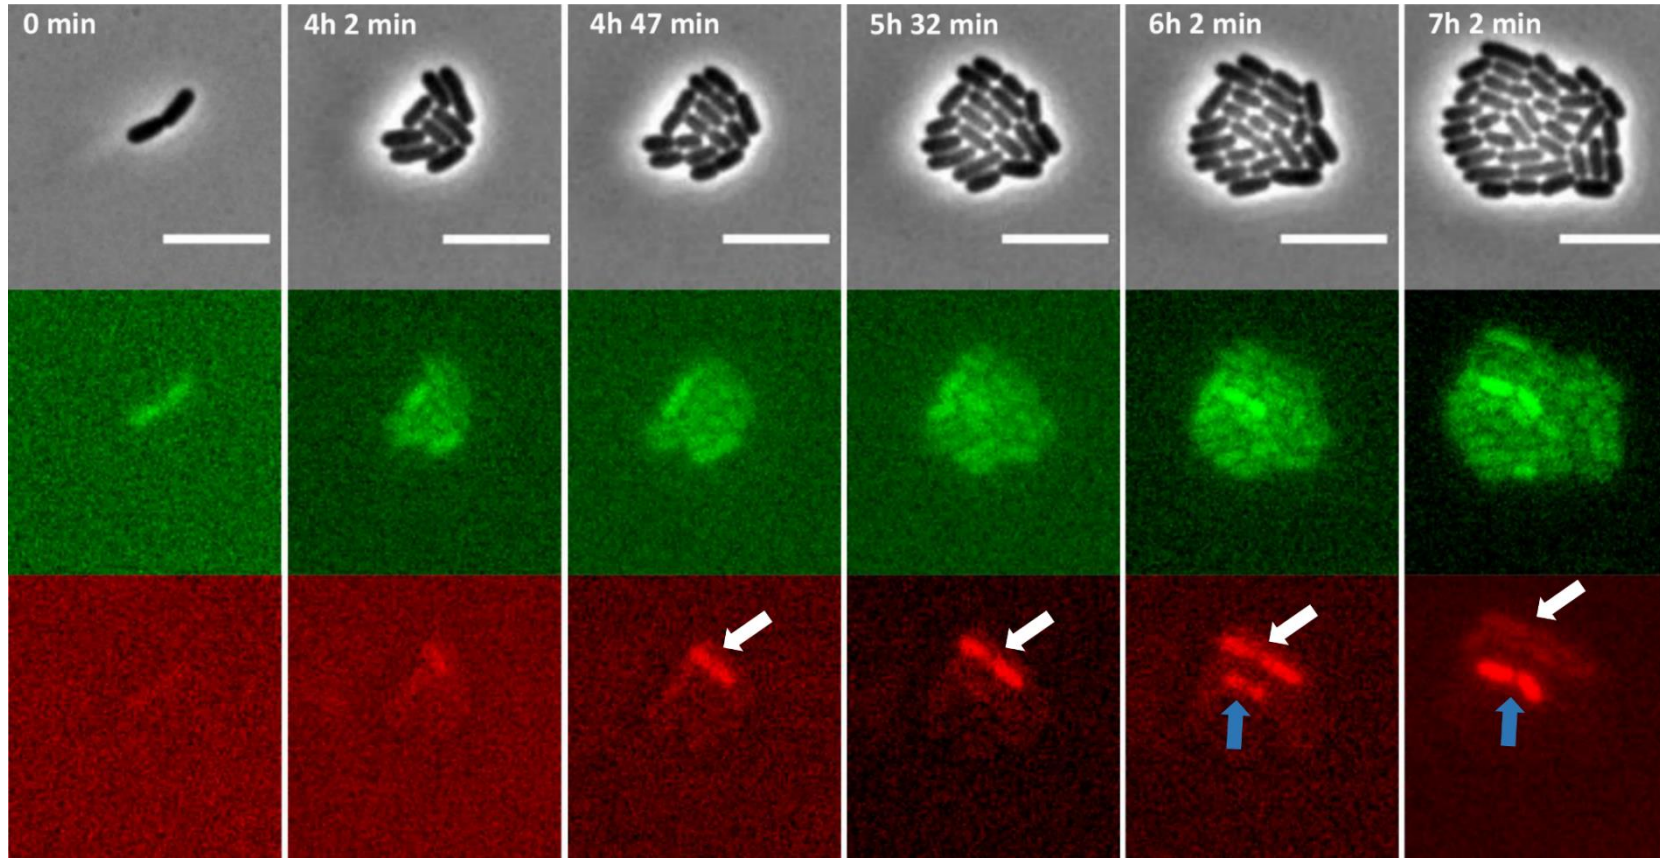

Figure S4. Images of a time-lapse fluorescence microscopy recording of the growth of a second representative microcolony of the *S. Typhimurium* ATCC14028s *spvR-msfGFP\_ΔspvA::mCherry* strain showing heterogeneous and uncoordinated  $P_{spvR}$  and  $P_{spvA}$  bursting. The strain was grown to stationary phase in ISM and subsequently seeded and monitored on ISM agarose pads at 37°C for the time indicated. White arrows indicate cells with an initial  $P_{spvA}$  burst but without an observable  $P_{spvR}$  burst, while blue arrows indicate cells in which  $P_{spvA}$  and  $P_{spvR}$  bursting is coordinated, reminiscent of the dynamics of the *S. Typhimurium* ATCC14028s *spvR-msfGFP\_spvA::mCherry* strain. The pixel intensities in the different frames are not comparable and the images are merely a qualitative illustration of the bursting process. The image panels represent the phase contrast channel, the GFP fluorescent channel and the mCherry fluorescent channel. Scale bars correspond to 5  $\mu\text{m}$ .

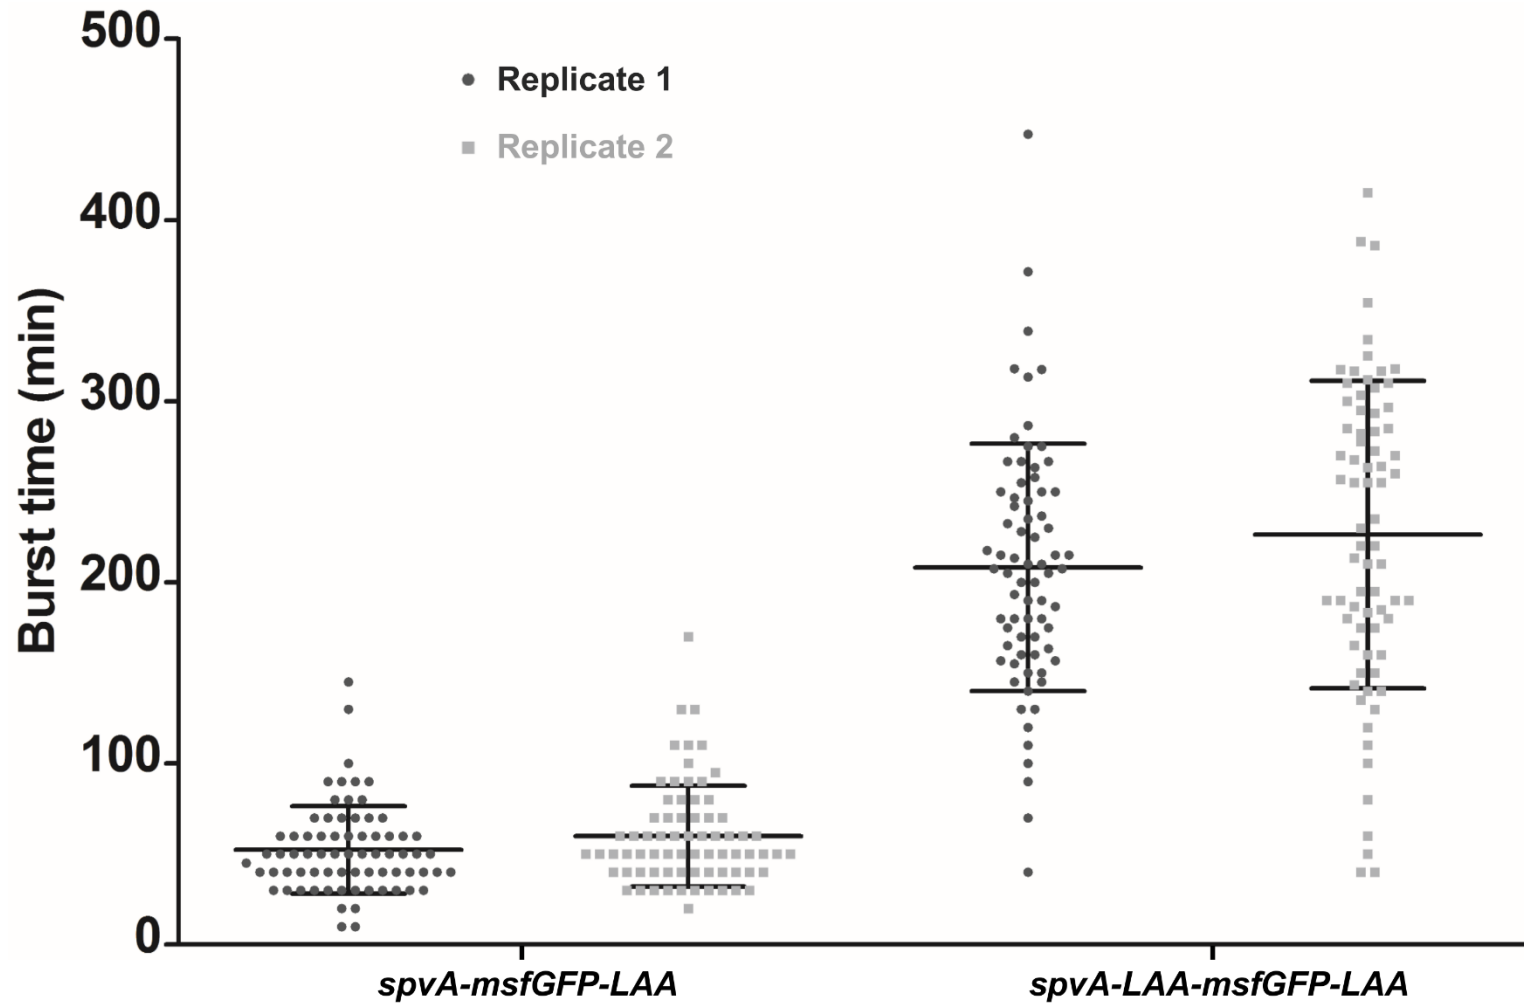

Figure S5. Quantification of the burst time of individual cells of the *spvA-msfGFP-LAA* strain and the *spvA-LAA-msfGFP-LAA* strain for two biological replicates. Each dot represents a single cell burst time ( $n = 70-73$  cells) derived from at least 14 different microcolonies per strain and replicate. In case the burst time exceeded the generation time, an average was made between the burst times of all resulting daughter cells. The mean (horizontal black line) and standard deviation is shown on top of the individual data points. This figure was constructed using the same dataset as in Figure 7C.

## Supplementary tables

Supplementary Table 1. Bacterial strains and phages used throughout this study

| Name                                                  | Relevant characteristic                                                                                                                                                                                         | Source our reference                           |
|-------------------------------------------------------|-----------------------------------------------------------------------------------------------------------------------------------------------------------------------------------------------------------------|------------------------------------------------|
| <b>Strains</b>                                        |                                                                                                                                                                                                                 |                                                |
| <i>Escherichia coli</i>                               |                                                                                                                                                                                                                 |                                                |
| K-12 DH5α                                             | F <sup>-</sup> ϕ80/ <i>lacZ</i> ΔM15 Δ( <i>lacZYA-argF</i> ) U169 <i>endA1recA1hsdR17deoRthi1supE4412gyrA96relA1</i> .                                                                                          | Laboratory collection                          |
| K-12 MG1655                                           | F <sup>-</sup> λ <sup>-</sup> <i>ilvG<sup>-</sup> rfb-50 rph-1</i> .                                                                                                                                            | (1)                                            |
| S17-1Δ <i>pir</i>                                     | F <sup>-</sup> Tp <sup>R</sup> Sm <sup>R</sup> <i>recA1, thiE1, pro-82, hsdR17-M+RP4-2 (Tc:Mu: Km Tn7 Δpir)</i> . Strain used for Tn5-based transposon mutagenesis.                                             | Víctor de Lorenzo (CNB Madrid, Spain)          |
| MG1655 <i>cat-lacI</i>                                | Contains a <i>cat</i> cassette upstream of the <i>lacI</i> gene.                                                                                                                                                | This work                                      |
| MG1655 <i>cat-lacI</i> /pSLT- <i>spvA::Tn5-mVenus</i> | Contains a <i>cat</i> cassette upstream of the <i>lacI</i> gene and harbors the pSLT plasmid with the SpvA_59::mVenus fusion protein.                                                                           | This work                                      |
| <i>Salmonella</i> Typhimurium                         |                                                                                                                                                                                                                 |                                                |
| LT2                                                   | Parental strain.                                                                                                                                                                                                | (2)                                            |
| ATCC14028s                                            | Parental strain (more virulent than LT2).                                                                                                                                                                       | Josep Casadesús (University of Sevilla, Spain) |
| ATCC14028s Δ <i>pSLT</i>                              | ATCC14028s cured from the pSLT virulence plasmid. <i>trg::MudQ</i> (Cm <sup>30</sup> resistant).                                                                                                                | Josep Casadesús (University of Sevilla, Spain) |
| LT2 <i>finO::TetRA</i>                                | Deletion of pSLT-borne <i>finO</i> gene. Acceptor strain used for transposon mutagenesis of the pSLT plasmid.                                                                                                   | This work                                      |
| LT2 <i>mrr::Cm ΔpSLT</i>                              | Resistant to Cm <sup>30</sup> and devoid of pSLT. Acceptor strain used for harboring pSLT::Tn5 mutants.                                                                                                         | Laboratory collection                          |
| <i>spvA::Tn5-mVenus</i>                               | Constructed in both LT2 and ATCC14028s. Tn5- <i>mVenus</i> transposon inserted after 177 bp from ATG (+1) of <i>spvA</i> and yielding the SpvA_59::mVenus fusion protein when the <i>npt</i> marker is present. | This work                                      |
| <i>spvA::Tn5-mVenus</i> flipped                       | Constructed in both LT2 and ATCC14028s. Obtained by flipping out the <i>npt</i> marker the <i>spvA::Tn5-mVenus</i> strain and now expressing the SpvA_59::mVenus::SpvA_197 "sandwich" fusion protein.           |                                                |
| <i>spvB::Tn5-mVenus</i>                               | Constructed in both LT2 and ATCC14028s. Tn5- <i>mVenus</i> transposon inserted after 1047 bp from ATG (+1) of <i>spvB</i> and yielding the SpvB_349::mVenus fusion protein.                                     | This work                                      |
| <i>spvR-msfGFP spvA-mCherry</i>                       | ATCC14028s background. 3' end transcriptional fusions of <i>msfGFP</i> and <i>mCherry</i> to, respectively, <i>spvR</i> and <i>spvA</i> .                                                                       | This work                                      |
| <i>spvR-msfGFP ΔspvA::mCherry</i>                     | ATCC14028s background. 3' end transcriptional fusion of <i>msfGFP</i> to <i>spvR</i> and translational fusion of first 10 AA of SpvA to mCherry (the rest of SpvA is deleted).                                  | This work                                      |
| P <sub>LtetO-1</sub> - <i>spvR spvA-msfGFP</i>        | ATCC14028s background. SpvR under control of the aTc-inducible P <sub>LtetO-1</sub> promoter and 3' end transcriptional fusion of <i>msfGFP</i> to <i>spvA</i> .                                                | This work                                      |
| <i>spvA::mVenus</i>                                   | ATCC14028s background. C-terminal translational fusion of mVenus to SpvA.                                                                                                                                       | This work                                      |

|                                                 |                                                                                                                                           |                                        |
|-------------------------------------------------|-------------------------------------------------------------------------------------------------------------------------------------------|----------------------------------------|
| <i>spvB::Tn5-mVenus</i><br><i>spvC::mCherry</i> | ATCC14028s background. The <i>spvB::Tn5-mVenus</i> strain containing a C-terminal translational fusion of mCherry to SpvC.                | This work                              |
| <i>spvA-msfGFP-LAA</i>                          | ATCC14028s background. 3' end transcriptional fusion of <i>msfGFP-LAA</i> to <i>spvA</i> .                                                | This work                              |
| <i>spvA-LAA-msfGFP-LAA</i>                      | ATCC14028s background. Strain where <i>ssrA</i> (LAA degradation tag) is coupled directly to <i>spvA</i> , in addition to <i>msfGFP</i> . | This work                              |
| <i>spvA::Tn5-mVenus flipped</i><br><i>ΔrpoS</i> | Constructed in both ATCC14028s and LT2 backgrounds. Deletion of the <i>rpoS</i> allele.                                                   | This work                              |
| <b>Phages</b>                                   |                                                                                                                                           |                                        |
| P22 <i>HT105/1 int-201</i>                      | Integrase deficient mutant of P22 used for generalized transduction.                                                                      | Kelly Hughes (University of Utah, USA) |

Supplementary Table 2. Plasmids used throughout this study

| Name                                         | Relevant characteristic                                                                                                      | Source our reference                                |
|----------------------------------------------|------------------------------------------------------------------------------------------------------------------------------|-----------------------------------------------------|
| pKD46                                        | Encodes $\lambda$ <i>red</i> genes under control of arabinose inducible promoter.                                            | (3)                                                 |
| pKD46 <i>bla::Tn10</i>                       | Similar as above but OxyTc <sup>10</sup> resistant instead of Ap <sup>100</sup> and used to amplify <i>tetRA</i> cassette    | (4)                                                 |
| pKD4                                         | Harbors <i>frt-npt-frt</i> cassette.                                                                                         | (3)                                                 |
| pKD3                                         | Harbors <i>frt-cat-frt</i> cassette                                                                                          | (3)                                                 |
| pKD13                                        | Harbors <i>frt-cat-frt</i> cassette                                                                                          | (3)                                                 |
| pCP20                                        | Encodes Flp for recombining <i>frt</i> sites.                                                                                | (5)                                                 |
| pBAM1-GFP                                    | Harbors the original Tn5-GFP transposon.                                                                                     | Víctor de Lorenzo (CNB Madrid, Spain)               |
| pBAM1-Tn5- <i>mVenus</i>                     | Harbors the Tn5- <i>mVenus</i> transposon.                                                                                   | This work                                           |
| pGKBD- <i>mCherry</i>                        | Harbors the <i>mCherry-frt-cat-frt</i> template for recombineering of <i>mCherry</i> .                                       | Sander Govers (KULeuven, Belgium)                   |
| pDHL1029- <i>msfGFP</i>                      | Harbors the <i>msfGFP-frt-npt-frt</i> template for recombineering of <i>msfGFP</i> .                                         | Johan Paulsson (Harvard Medical School, USA)<br>(6) |
| pBAM1-Tn5- <i>P<sub>LtetO-1</sub>-msfGFP</i> | Harbors the Tn5- <i>P<sub>LtetO-1</sub>-msfGFP</i> transposon used to amplify the <i>tetR- P<sub>LtetO-1</sub></i> construct | This work                                           |

Supplementary Table 3. Primers used for strain construction

| Primer name                       | Sequence (5'-3') <sup>a</sup>                | Purpose                                            |
|-----------------------------------|----------------------------------------------|----------------------------------------------------|
| linker1                           | TTTCTGCTCGAATTCAAGCTTCTAACGATGTACGGGGACACATG | Y linker (7)                                       |
| phosphorylated linker2            | TGTCCCCGTACATCGTTAGAACTACTCGTACCATCCACAT     | Y linker (7)                                       |
| Tn5- <i>mVenus</i> _up_out_BamHI  | TATAggatccTGATCTTCCGTCACAGGTAG               | Amplification of pBAM1-Tn5- <i>mVenus</i> backbone |
| Tn5- <i>mVenus</i> _dwn_out_BamHI | TATAggatccAAATGAAGTTCCTATTCCGA               | Amplification of pBAM1-Tn5- <i>mVenus</i> backbone |
| npt_BamHI_Fw                      | TACGggatccGAATAGGAACCTTCAAGATCC              | Amplification of <i>neo</i> cassette from pKD4     |
| npt_BamHI_Rev                     | TACGggatccGAAGAACTCCAGCATGAGAT               | Amplification of <i>neo</i> cassette from pKD4     |



|                                |                                                                                                                   |                                                                                                                       |
|--------------------------------|-------------------------------------------------------------------------------------------------------------------|-----------------------------------------------------------------------------------------------------------------------|
| Y_linker_primer                | CTGCTCGAATTCAAGCTTCT                                                                                              | Mapping of transposon insertions using Y linker (7)                                                                   |
| Tn5-mVenus_up_out              | CTTCACCCTCTCCACTGACAG                                                                                             | Mapping of Tn5- <i>mVenus</i> insertions                                                                              |
| $\Delta$ finO::tetRA_Fw        | GTGGTATCTTTGGCGGTATGAGCAGGATTTGGCAGGGGCAGCATA<br>CAGCATGT <b>TAAAGACCCACTTTACATT</b>                              | Deletion of <i>finO</i> using <i>tetRA</i> cassette from pKD46<br><i>bla</i> ::Tn10                                   |
| $\Delta$ finO::tetRA_Rev       | GTTCACTCATTATACTGGGCTTCTCCGGTTCAGACCGTCTGCGCCA<br>G <b>CACTAAGCACTTGTCTCCTGTTTAC</b>                              | Deletion of <i>finO</i> using <i>tetRA</i> cassette from pKD46<br><i>bla</i> ::Tn10                                   |
| prgl_mCer3_Cterm_Fw            | ACGGTAAAAGTCTTTAAGGATATTGATGCTGCCATTATTCAGAACTT<br>CCGT <b>GGCAGCGGCAGCGGCA</b>                                   | Construction of ATCC14028s <i>prgl-mCerulean3</i> from<br>pGKBD-mCerulean3                                            |
| prgl_mCer3_Cterm_Rev           | GCATTCTCAGGGACAATAGTTGCAATCGACATAATCCACCTTATAA<br>CTG <b>AGTGTAAGGCTGGAGCTGCTTC</b>                               | Construction of ATCC14028s <i>prgl-mCerulean3</i> from<br>pGKBD-mCerulean3                                            |
| ssaG_mCher_Cterm_Fw            | ACTGATCAAAATGATCAAGGATATGCTTAGTGGAATCATTGCTAAA<br>ATC <b>GGCAGCGGCAGCGG</b>                                       | Construction of ATCC14028s <i>ssaG-mCherry</i> from<br>pGKBD-mCherry                                                  |
| ssaG_mCher_Cterm_Rev           | CGCAAACATGATTTCCAGCAGCAACCGTCGAACATCGTCGCTAATA<br>ACT <b>GTGTAGGCTGGAGCTGCTTC</b>                                 | Construction of ATCC14028s <i>ssaG-mCherry</i> from<br>pGKBD-mCherry                                                  |
| spvA_mCher_Cterm_Fw            | AGGTGGAACAGTTGATTGCGGGTACTCTGCGTGCCAGCCGGCAG<br>TTTAGATTAAAGAGGAGAAATTAAGCATG <b>GTGAGCAAGGGCGAGG</b><br><b>A</b> | Construction of ATCC14028s <i>spvA-mCherry</i> from<br>pGKBD-mCherry                                                  |
| $\Delta$ spvA::mCherry_Fw      | TTCAGGAGTCATCATTATTTATGAATATGAATCAGACCACAGTCC<br>GGC <b>AGGCAGCGGCAGCGGCA</b>                                     | Construction of ATCC14028s <i><math>\Delta</math>spvA::mCherry</i> (first<br>10AA of SpvA) from pGKBD-mCherry         |
| spvA_mCher_Cterm_Rev           | TCAGATTCTGCAGAATGGTCTGCTGCTCACTACTCTGGTAGCGCG<br>GGAAG <b>GTGTAGGCTGGAGCTGCTTC</b>                                | Construction of ATCC14028s <i>spvA-mCherry</i> from<br>pGKBD-mCherry                                                  |
| spvA_msfGFP_Cterm_Fw           | GGTGAACAGTTGATTGCGGGTACTCTGCGTGCCAGCCGGCAGTT<br>TAGATTAAAGAGGAGAAATTAAGCATG <b>AGTAAAGGTGAAGAACTG</b>             | Construction of ATCC14028s <i>spvA-msfGFP</i> from<br>pDHL1029-msfGFP                                                 |
| spvA_msfGFP_Cterm_Rev          | TCAGATTCTGCAGAATGGTCTGCTGCTCACTACTCTGGTAGCGCG<br>GGAAG <b>ATTCCGGGGATCCGTCGACC</b>                                | Construction of ATCC14028s <i>spvA-msfGFP</i> from<br>pDHL1029-msfGFP                                                 |
| spvA_mVen_Cterm_Fw             | CCCCAGGTGGAACAGTTGATTGCGGGTACTCTGCGTGCCAGCCG<br>GCAGTTAGCGGTGGCGGTGGC <b>AGCAAAGGAGAAGAAGCTT</b>                  | Construction of ATCC14028s <i>spvA::mVenus</i> from<br>pBAM1-Tn5- <i>mVenus</i>                                       |
| spvA_mVen_Cterm_Rev            | AGATTCTGCAGAATGGTCTGCTGCTCACTACTCTGGTAGCGCGGG<br>AAGCTAT <b>GCGGCCGCACCTGCAGG</b>                                 | Construction of ATCC14028s <i>spvA::mVenus</i> from<br>pBAM1-Tn5- <i>mVenus</i>                                       |
| spvR_msfGFP_Cterm_Fw           | GTAAGCTATAAACTGATACAGCAGGAAGTGAACAGTCCACCTT<br>CTGAATTAAAGAGGAGAAATTAAGCATG <b>AGTAAAGGTGAAGAACT</b><br><b>GT</b> | Construction of ATCC14028s <i>spvR-msfGFP</i> from<br>pDHL1029-msfGFP                                                 |
| spvR_msfGFP_Cterm_Rev          | CTGGCAAATGCCGTGAATACAGGTGTTGCGGCCCTTACGCTGCAT<br>AAGG <b>ATTCCGGGGATCCGTCGACC</b>                                 | Construction of ATCC14028s <i>spvR-msfGFP</i> from<br>pDHL1029-msfGFP                                                 |
| P <sub>LtetO-1</sub> -spvR_Fw  | GTTATGAAAATTTTTAATTTTTTATTAATCAAGAAATCCATAATATCT<br>CCT <b>GGTCAGTGCGTCTGCTGAT</b>                                | Construction of ATCC14028s P <sub>LtetO-1</sub> - <i>spvR</i> from pBAM1-<br>Tn5-P <sub>LtetO-1</sub> - <i>msfGFP</i> |
| P <sub>LtetO-1</sub> -spvR_Rev | TTGAAACCAAGCATCTTCATTGATCATGGGTATACATCGTTGTTATC<br>CAGTT <b>AAGACCCACTTTACATT</b>                                 | Construction of ATCC14028s P <sub>LtetO-1</sub> - <i>spvR</i> from pBAM1-<br>Tn5-P <sub>LtetO-1</sub> - <i>msfGFP</i> |
| spvC_mCher_Cterm_Fw            | TGCAGAGACAGGCTTTACGTGAGGAACCGTTTTATCGTTTGATGAC<br>AGAG <b>GGCAGCGGCAGCGGCA</b>                                    | Construction of ATCC14028s <i>spvC-mCherry</i> from<br>pGKBD-mCherry                                                  |

|                               |                                                                                                                                    |                                                                                                                                                               |
|-------------------------------|------------------------------------------------------------------------------------------------------------------------------------|---------------------------------------------------------------------------------------------------------------------------------------------------------------|
| spvC_mCher_Cterm_Rev          | AAATAGCTGTTTAACGGCGTTTACTGTTCCGTTGCTCCCCAAACCC<br>ATAC <b>GTGTAGGCTGGAGCTGCTTC</b>                                                 | Construction of ATCC14028s <i>spvC-mCherry</i> from pGKBD-mCherry                                                                                             |
| spvR_msfGFP_ssrA_cat_Fw       | GTTTCGTTACTGCAGCAGGTATCACGCACGGCATGGATGAACTCTA<br>CAAAGCAGCAAACGACGAAAACTACGCTTTAGCAGCTTAA <b>GGCAT</b><br><b>CAAATTAAGCAGAAG</b>  | Construction of ATCC14028s <i>spvR-msfGFP-LAA-frt-cat-frt</i> from pKD3                                                                                       |
| spvR_msfGFP_ssrA_cat_Rev      | CTGGCAAATGCCGTGAATACAGGTGTTGCGGCCCTTACGCTGCAT<br>AAGGCCATATGAATATCCTCCTTAG                                                         | Construction of ATCC14028s <i>spvR-msfGFP-LAA-frt-cat-frt</i> from pKD3                                                                                       |
| spvA_msfGFP_ssrA_cat_Fw       | GTAAGCTATAAACTGATACAGCAGGAAGTAAACAGTCCACCTT<br>CTGAATTAAGAGGAGAAATTAAGCATG <b>AGTAAAGGTGAAGAACT</b><br><b>GT</b>                   | Construction of ATCC14028s <i>spvA-msfGFP-LAA-frt-cat-frt</i> from DNA template of <i>spvR-msfGFP-LAA-frt-cat-frt</i>                                         |
| spvA_msfGFP_ssrA_cat_Rev      | CCGGTGAACAGTTCTTCACCTTTACTCATGCTTAATTTCTCCTCTTT<br>AAT <b>CCATATGAATATCCTCCTTAG</b>                                                | Construction of ATCC14028s <i>spvA-msfGFP-LAA-frt-cat-frt</i> from DNA template of <i>spvR-msfGFP-LAA-frt-cat-frt</i>                                         |
| spvA_ssrA_msfGFP_ssrA_cat_Fw  | CCCCAGGTGGAACAGTTGATTGCGGGTACTCTGCGTGCCAGCCG<br>GCAGTTGCAGCAAACGACGAAAACTACGCTTTAGCAGCTTAA <b>ATTA</b><br><b>AAGAGGAGAAATTAAGC</b> | Construction of ATCC14028s <i>spvA-LAA-msfGFP-LAA-frt-cat-frt</i> from DNA template of <i>spvA-msfGFP-LAA-frt-cat-frt</i>                                     |
| spvA_ssrA_msfGFP_ssrA_cat_Rev | TCAGATTCTGCAGAATGGTCTGCTGCTCACTACTCTGGTAGCGCG<br>GGAAG <b>CCATATGAATATCCTCCTTAG</b>                                                | Construction of ATCC14028s <i>spvA-LAA-msfGFP-LAA-frt-cat-frt</i> from DNA template of <i>spvA-msfGFP-LAA-frt-cat-frt</i>                                     |
| $\Delta$ rpoS_cat_Fw          | TCCGTCAAGGGATCACGGGTAGGAGCCACCTTATGAGTCAGAATA<br>CGCTGATT <b>CCGGGGATCCGTCGAC</b>                                                  | Construction of ATCC14028s <i>spvA::Tn5-mVenus flipped <math>\Delta</math>rpoS</i> and LT2 <i>spvA::Tn5-mVenus flipped <math>\Delta</math>rpoS</i> from pKD13 |
| $\Delta$ rpoS_cat_Rev         | GTCGACAGACTGGCCTTTTTTTGACAAGGGTACTTACTCGCGGAA<br>CAGCGCT <b>AGTGTAGGCTGGAGCTGCTTC</b>                                              | Construction of ATCC14028s <i>spvA::Tn5-mVenus flipped <math>\Delta</math>rpoS</i> and LT2 <i>spvA::Tn5-mVenus flipped <math>\Delta</math>rpoS</i> from pKD13 |

\*When relevant, primer attachments sites are shown in bold, the linker regions (coding for SGGGG or GSGSGS) are shown in italic, the restriction enzyme sites are uncapitalized, the RBS sequence is underlined, and the sequence coding for the ssrA tag is both in italic and underlined.

## References

1. Blattner, F.R., Plunkett, G., 3rd, Bloch, C.A., Perna, N.T., Burland, V., Riley, M., Collado-Vides, J., Glasner, J.D., Rode, C.K., Mayhew, G.F. *et al.* (1997) The complete genome sequence of Escherichia coli K-12. *Science*, **277**, 1453-1462.
2. McClelland, M., Sanderson, K.E., Spieth, J., Clifton, S.W., Latreille, P., Courtney, L., Porwollik, S., Ali, J., Dante, M., Du, F. *et al.* (2001) Complete genome sequence of Salmonella enterica serovar Typhimurium LT2. *Nature*, **413**, 852-856.
3. Datsenko, K.A. and Wanner, B.L. (2000) One-step inactivation of chromosomal genes in Escherichia coli K-12 using PCR products. *Proceedings of the National Academy of Sciences of the United States of America*, **97**, 6640-6645.
4. Passaris, I., Ghosh, A., Cenens, W., Michiels, C.W., Lammertyn, J. and Aertsen, A. (2014) Isolation and validation of an endogenous fluorescent nucleoid reporter in Salmonella Typhimurium. *PloS one*, **9**, e93785.

5. Cherepanov, P.P. and Wackernagel, W. (1995) Gene disruption in *Escherichia coli*: TcR and KmR cassettes with the option of Flp-catalyzed excision of the antibiotic-resistance determinant. *Gene*, **158**, 9-14.
6. Ke, N., Landgraf, D., Paulsson, J. and Berkmen, M. (2016) Visualization of Periplasmic and Cytoplasmic Proteins with a Self-Labeling Protein Tag. *Journal of bacteriology*, **198**, 1035-1043.
7. Kwon, Y.M. and Ricke, S.C. (2000) Efficient amplification of multiple transposon-flanking sequences. *Journal of microbiological methods*, **41**, 195-199.
